# Supplementary material for: Genome-wide identification of the NRAMP gene family in kiwifruit and the response of AcNRAMP7 to cadmium stress
Source: Research Square preprint supplement (doi:10.21203/rs.3.rs-6967468/v1), 2025-07-18
Supplement: Supplementary file 1 [file 8bbae81422805ba12556c824.xlsx]

## Sheet: Sheet1
Table 1. Analysis of the physicochemical properties of the AcNRAMP gene family.
sequence ID	gene name	Number of amino acids (aa)	Molecular weight (kDa)	Theoretical pI	Instability index	Aliphatic index	Subcellular
							Localization
Actinidia36450.t1	AcNRAMP1	1106	121.198	5.2	41.35	93.47	Chloroplast
Actinidia32814.t1	AcNRAMP2	336	36.9787	7.86	27.17	123.24	Nucleus.
Actinidia19664.t1	AcNRAMP3	1291	141.578	5.73	40.88	92.8	Chloroplast
Actinidia31342.t1	AcNRAMP4	1230	135.046	5.75	38.65	89.93	Chloroplast
Actinidia35736.t1	AcNRAMP5	504	54.6547	9.01	39.98	123.65	Cell membrane
Actinidia21242.t1	AcNRAMP6	514	56.5084	5.16	32.34	118.97	Cell membrane
Actinidia10176.t1	AcNRAMP7	536	58.3933	5.35	37.87	114.48	Cell membrane
Actinidia10175.t1	AcNRAMP8	498	54.2655	6.27	35.91	112.83	Cell membrane
Actinidia22671.t1	AcNRAMP9	534	58.3541	5.79	34.95	114.72	Cell membrane
Actinidia22672.t1	AcNRAMP10	129	13.8979	4.43	41.79	103.57	Cell membrane
Actinidia21300.t1	AcNRAMP11	543	58.8733	8.35	30.75	118.53	Cell membrane
Actinidia16448.t1	AcNRAMP12	525	57.7288	5.34	32.93	118.51	Cell membrane
