# Supplementary material for: Genome-wide identification of the NRAMP gene family in kiwifruit and the response of AcNRAMP7 to cadmium stress
Source: Research Square preprint supplement (doi:10.21203/rs.3.rs-6967468/v1), 2025-07-18
Supplement: Supplementary file 2 [file ce31796b4642cf9c2ba694f0.xlsx]

## Sheet: Sheet1
Table 2: The best templates of kiwifruit AcNRAMP proteins selected from the SwissModel template library for building 3D structure models
Gene name	Template	Sequences identity (%)	Coverage	GMQE	QMEANDisCo global score	Description
AcNRAMP1	5m87.1.A	32.13	A44-461	0.23	0.63 ± 0.05	MntH
AcNRAMP2	5m87.1.A	30.04	A2-286	0.5	0.57 ± 0.05	MntH
AcNRAMP3	5m87.1.A	23.54	A11-464	0.2	0.58 ± 0.05	MntH
AcNRAMP4	5m87.1.A	25.34	A11-464	0.21	0.61 ± 0.05	MntH
AcNRAMP5	5m87.1.A	35.27	A8-465	0.57	0.62 ± 0.05	MntH
AcNRAMP6	5m87.1.A	31.88	A47-464	0.52	0.62 ± 0.05	MntH
AcNRAMP7	5m87.1.A	29.8	A69-515	0.52	0.61 ± 0.05	MntH
AcNRAMP8	5m87.1.A	31.33	A67-485	0.54	0.62 ± 0.05	MntH
AcNRAMP9	5m87.1.A	30.41	A66-513	0.57	0.62 ± 0.05	MntH
AcNRAMP10	5m87.1.A	26.4	A1-125	0.45	0.42 ± 0.07	MntH
AcNRAMP11	5m87.1.A	33.18	A37-495	0.59	0.62 ± 0.05	MntH
AcNRAMP12	5m87.1.A	31.88	A47-464	0.51	0.62 ± 0.05	MntH
